# Supplementary material for: Detection of Mycobacterium tuberculosis Antigens in Urinary Extracellular Vesicles using Real-Time Immuno-PCR: A Non-Invasive Diagnostic Approach for Pulmonary Tuberculosis
Source: Research Square preprint supplement (doi:10.21203/rs.3.rs-8212724/v1), 2025-12-08
Supplement: Supplementary file 1 [file 1a421230aade5dcfd1d616d4.docx]

**Detection of *Mycobacterium tuberculosis* Antigens in Urinary Extracellular Vesicles**

**using Real-Time Immuno-PCR: A Non-Invasive Diagnostic Approach for Pulmonary Tuberculosis**

**Ayushi Kaur Bedi**1, Bhawna Dahiya2, Monika Sharma1, Parul Mrigpuri3, Nitin Goel3,

Mandira Varma-Basil4,Promod K. Mehta2, Sadhna Sharma1*

1DSKC BioDiscovery Laboratory and Department of Zoology, Miranda House, University of Delhi, Delhi, India

2Faculty of Allied Health Sciences, Shree Guru Gobind Singh Tricentenary University, Gurugram 122505, India

3Department of Pulmonary Medicine, Vallabhbhai Patel Chest Institute, University of Delhi, Delhi, India

4Department of Microbiology, Vallabhbhai Patel Chest Institute, University of Delhi, Delhi, India

*Corresponding author

E-mail addresses:

ayushikaur.bedi@mirandahouse.ac.in (Ayushi Kaur Bedi)

sadhna.sharma@mirandahouse.ac.in (Sadhna Sharma)

**SUPPLEMENTARY TABLES**

|  |  | **PTB+ORD study participants (n=112)** | **Patients with PTB**  **(n=54)** | **ORD Controls**  **(n=58)** | ***p* value** |
| --- | --- | --- | --- | --- | --- |
| **Age** | Median  (IQR) | 44.50  (28.00-60.00) | 39.50  (23.00-60.00) | 45.00  (34.75-60.00) | 0.1337 |
| **Sex** | Male | 61 (54.46%) | 32 (59.26%) | 29 (50.0%) | 0.3484 |
| Female | 51 (45.54%) | 22 (40.74%) | 29 (50.0%) |
| **BCG Scar** | Present | 80 (71.43%) | 39 (72.22%) | 41 (70.69%) | 1.000 |
| **Smoking history** | Yes | 23 (20.54%) | 16 (29.63%) | 7 (12.07%) | 0.0338* |
| **Alcohol consumption** | Yes | 30 (26.78%) | 14 (25.93%) | 16 (27.59%) | 1.000 |
| **Chewing tobacco use** | Yes | 11 (9.82%) | 7 (12.96%) | 4 (6.90%) | 0.3494 |
| **TB-related Symptoms** | Cough >2 weeks | 102 (91.07%) | 52 (96.30%) | 50 (86.21%) | 0.0958 |
| Chest pain | 74 (66.07%) | 36 (66.67%) | 38 (65.52%) | 0.5676 |
| Fever | 45 (40.18%) | 31 (57.41%) | 14 (24.14%) | 0.0005*** |
| Breathlessness | 69 (61.61%) | 37 (68.52%) | 32 (55.17%) | 0.1756 |
| Hemoptysis | 11 (9.82%) | 9 (16.67%) | 2 (3.45%) | 0.0254* |
| Weight loss | 38 (33.93%) | 29 (53.70%) | 9 (15.52%) | < 0.0001**** |

**Supplementary Table 1. Demographic and clinical characteristics of patients with pulmonary tuberculosis (PTB) and other respiratory diseases (ORD) enrolled in the study.** Values are presented as median (interquartile range, IQR) or number (percentage). Comparisons between PTB cases (n = 54) and ORD controls (n = 58) were performed using the Mann–Whitney U test for continuous variables (age) and Fisher’s exact test for categorical variables. *p* values indicate differences between PTB and ORD groups. * *p* < 0.05, ** *p* < 0.01, *** *p* < 0.001, **** *p* < 0.0001.

| **MPT64+LAM concentration** | **RT-I-PCR** | | | **Indirect ELISA** | | |
| --- | --- | --- | --- | --- | --- | --- |
| **Ct Value (from Experiment 1)** | **Ct Value (from Experiment 2)** | **Mean Ct Value** | **OD value (from Experiment 1)** | **OD value (from Experiment 2)** | **Mean OD value** |
| 10 µg/mL |  |  |  | 0.365 | 0.342 | 0.3535 |
| 1 µg/mL | 9.03 | 9.07 | 9.05 | 0.273 | 0.267 | 0.270 |
| 100 ng/mL | 11.81 | 12.1 | 11.955 | 0.162 | 0.148 | 0.155 |
| 10 ng/mL | 14.2 | 13.31 | 13.755 | 0.101 | 0.110 | 0.1055 |
| 1 ng/mL | 15.42 | 15.58 | 15.5 | 0.098 | 0.099 | 0.0985 |
| 100 pg/mL | 16.76 | 16.91 | 16.835 |  |  |  |
| 10 pg/mL | 17.76 | 18.2 | 17.98 |  |  |  |
| 1 pg/mL | 18.78 | 19.21 | 18.995 |  |  |  |
| 100 fg/mL | 19.8 | 20.12 | 19.96 |  |  |  |
| 10 fg/mL | 20.33 | 20.52 | 20.425 |  |  |  |
| Negative control  (NC; without antigen) | 20.34 | 20.95 | 20.6467 | 0.099 | 0.0995 | 0.0993 |

**Supplementary Table 2. Mean Ct values (RT-I-PCR) and OD values (indirect ELISA) obtained from two independent experiments using serial dilutions of purified MPT-64+LAM antigens.** For RT-I-PCR, the limit of detection (LOD) was calculated as 9.7 fg/mL based on the mean of NC + 3SD threshold (Ct = 21.5617). For indirect ELISA, the LOD was estimated at 3.7 ng/mL using the mean of NC + 2SD (OD = 0.0999).
