# Supplementary material for: Detection of Mycobacterium tuberculosis Antigens in Urinary Extracellular Vesicles using Real-Time Immuno-PCR: A Non-Invasive Diagnostic Approach for Pulmonary Tuberculosis
Source: Research Square preprint supplement (doi:10.21203/rs.3.rs-8212724/v1), 2025-12-08
Supplement: Supplementary file 2 [file a74cd82943ecfb507bc24a94.docx]

**Detection of *Mycobacterium tuberculosis* Antigens in Urinary Extracellular Vesicles**

**using Real-Time Immuno-PCR: A Non-Invasive Diagnostic Approach for Pulmonary Tuberculosis**

**Ayushi Kaur Bedi**1, Bhawna Dahiya2, Monika Sharma1, Parul Mrigpuri3, Nitin Goel3,

Mandira Varma-Basil4,Promod K. Mehta2, Sadhna Sharma1*

1DSKC BioDiscovery Laboratory and Department of Zoology, Miranda House, University of Delhi, Delhi, India

2Faculty of Allied Health Sciences, Shree Guru Gobind Singh Tricentenary University, Gurugram 122505, India

3Department of Pulmonary Medicine, Vallabhbhai Patel Chest Institute, University of Delhi, Delhi, India

4Department of Microbiology, Vallabhbhai Patel Chest Institute, University of Delhi, Delhi, India

*Corresponding author

E-mail addresses:

ayushikaur.bedi@mirandahouse.ac.in (Ayushi Kaur Bedi)

sadhna.sharma@mirandahouse.ac.in (Sadhna Sharma)

**SUPPLEMENTARY FIGURES**

**
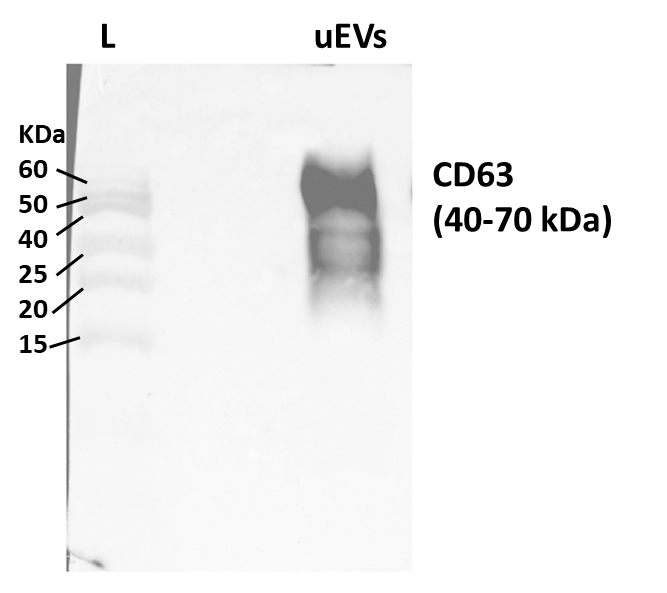
**

**Supplementary Fig. 1** Full uncroppedwestern blot showing CD63 (~40–70 kDa) expression as an extracellular vesicle (EV) marker. L represents protein molecular weight marker.


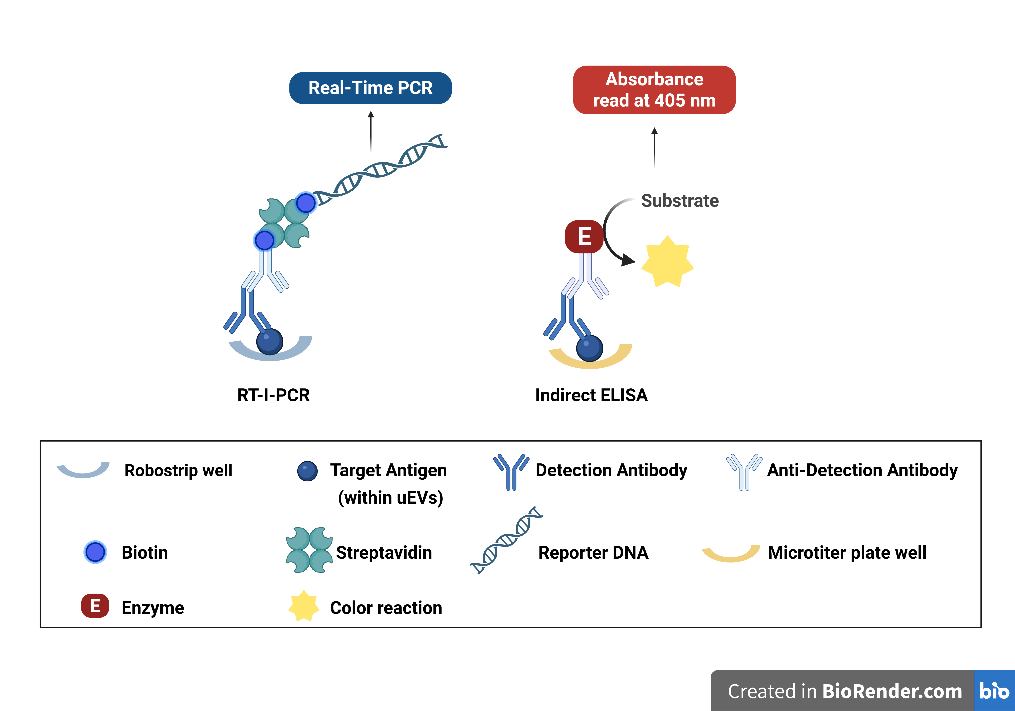


**Supplementary Fig. 2 Schematic representation of the methodology employed for detecting Mtb antigens (MPT-64+LAM) within urinary extracellular vesicles (uEVs).** The assays were applied to uEVs isolated from pulmonary tuberculosis (PTB) patients, latent TB infection (LTBI) subjects, other respiratory disease (ORD) cases, and healthy controls. Created with BioRender.com.

**
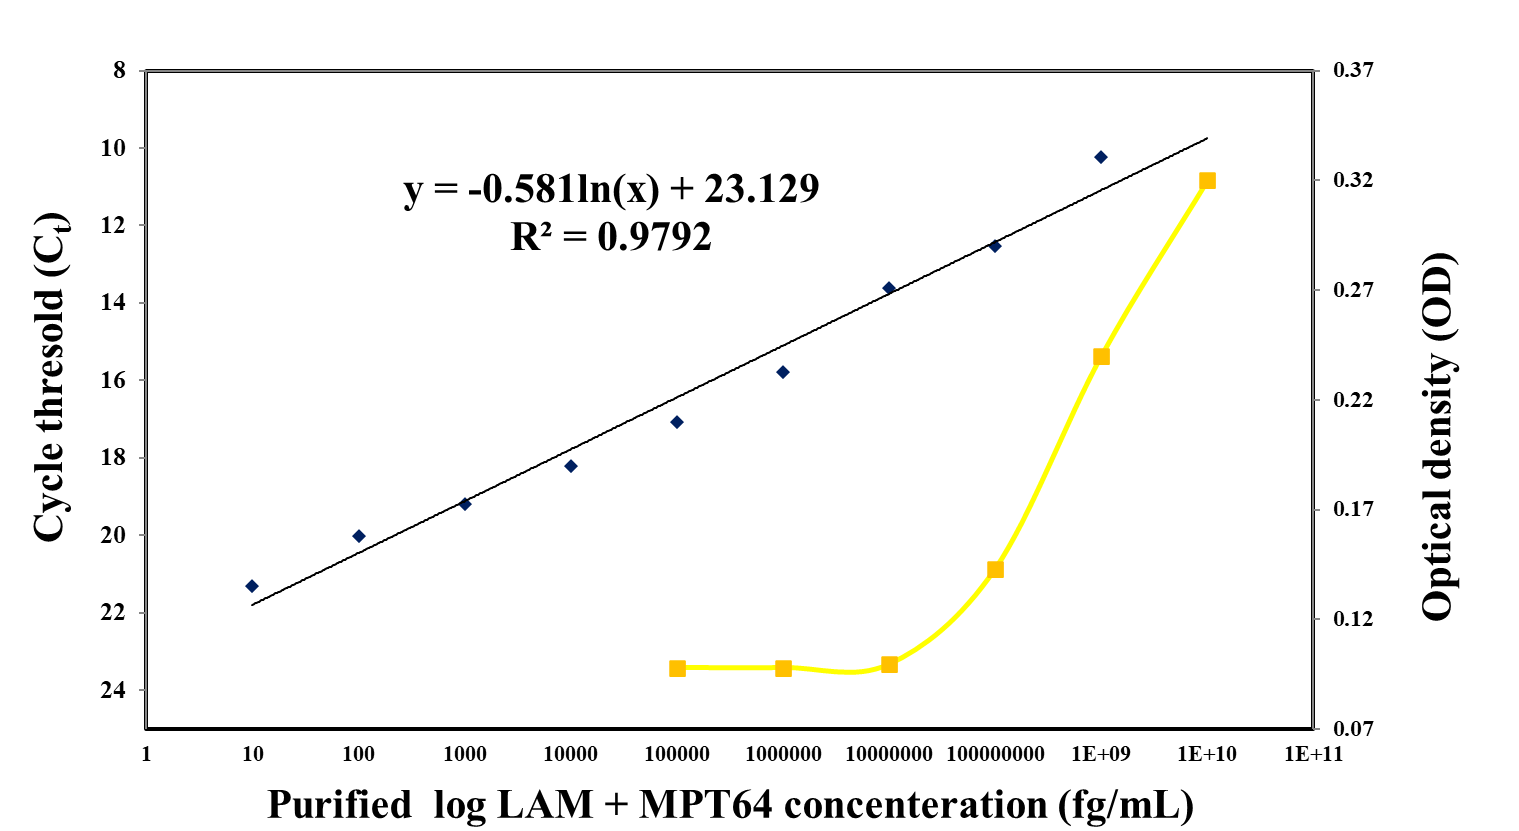
Supplementary Fig. 3 Standard curve(s) for healthy control uEVs spiked with purified MPT64+LAM using RT-I-PCR (10 fg/mL to 1 μg/mL) and indirect ELISA (100 pg/mL to 10 μg/mL).** The regression equation for RT-I-PCR was *Ct = −0.581 × ln(conc.) + 23.129* with an R² of 0.9792. The mean Ct values (RT-I-PCR) and OD values (indirect ELISA) were obtained from two independent experiments; each performed in duplicate. Data points represent mean values.
